# Supplementary material for: dMSCC: a microfluidic platform for microbial single-cell cultivation of Corynebacterium glutamicum under dynamic environmental medium conditions
Source: Royal Society of Chemistry journal article supplement (doi:10.1039/d0lc00711k), 2020-01-01
Supplement: d0lc00711k1.pdf [file d0lc00711k1.pdf]

## 1 **Supplementary Information**

2 **Title: dMSCC: A microfluidic platform for microbial single-cell cultivation of**  
3 ***Corynebacterium glutamicum* under dynamic environmental medium conditions**

4 Authors: Sarah Täuber<sup>1</sup>, Corinna Golze<sup>1</sup>, Phuong Ho<sup>2</sup>, Eric von Lieres<sup>2</sup> and Alexander  
5 Grünberger<sup>1\*</sup>

6

7 <sup>1</sup> *Multiscale Bioengineering, Technical Faculty, Bielefeld University, Universitätsstraße 25, 33615*  
8 *Bielefeld, Germany*

9 <sup>2</sup> *Institute of Bio- and Geosciences, IBG-1: Biotechnology, Forschungszentrum Jülich, 52425 Jülich,*  
10 *Germany*

11 \*Corresponding author:

12 E-Mail: alexander.gruenberger@uni-bielefeld.de

13

## 14 **SI Materials and methods**

### 15 **CFD**

#### 16 ***Geometry and operating conditions***

17 The geometry was adapted from Probst et al.<sup>1</sup> It has a symmetric design with two supply  
18 channels flanking the cultivation chamber. The cultivation chamber was modelled with the  
19 exact dimensions shown here, 90 µm width, 80 µm length and 0.8 µm height. It is directly  
20 connected to the supply channels that are 100 µm wide, 140 µm long and 10 µm high. Both  
21 supply channels are modelled 30 µm upstream and downstream of the cultivation chamber.  
22 Inlet and outlet boundary conditions were applied at these positions. Symmetry along a  
23 symmetry plane through the cultivation chamber was exploited to reduce computation time.  
24 For an additional study, a typical colony of 300 cells were implemented and described as cut  
25 out volumes within the chamber. These volumes were inaccessible for the fluid. The  
26 boundaries of the cell volumes were equipped with a Monod-sink term.

#### 27 ***Simulation setup***

28 Calculations of the stationary velocity field and the transient mass transport were performed  
29 using COMSOL Multiphysics 5.4.0.225 (COMSOL AB, Sweden). For the stationary velocity  
30 field, the stationary Navier-Stokes equations<sup>2</sup> for an incompressible, isothermal, Newtonian  
31 fluid were solved:

32 
$$\mu \nabla^2 \mathbf{u} = \nabla p$$

33 
$$\nabla \cdot \mathbf{u} = 0$$

34 where  $\mathbf{u}$  denotes the fluid velocity vector in  $\text{m s}^{-1}$ ,  $p$  the fluid pressure in Pa, and  $\mu$  the dynamic  
 35 viscosity in Pa s. The properties of the fluid within the channels and the cultivation chamber  
 36 were treated as identical to pure water. The parabolic velocity profile at the inlets of the supply  
 37 channels was applied using the laminar inflow feature of COMSOL Multiphysics with an inflow  
 38 length of  $100 \mu\text{m}$ . The flow rate at the inlet was set to be  $500 \text{ nl min}^{-1}$  per supply channel, which  
 39 means a total flow rate of  $6.5 \mu\text{l min}^{-1}$  for the whole system. For the PDMS and glass walls, the  
 40 no-slip condition was used.

41 For the mass transport the diffusion-advection equation according to Deen<sup>2</sup> was applied:

42 
$$\frac{\partial c}{\partial t} + \nabla \cdot (-D \nabla c) + \mathbf{u} \cdot \nabla c = 0$$

43 where  $c$  denotes the substrate concentration in  $\text{mmol L}^{-1}$ ,  $D$  the binary diffusion coefficient of  
 44 the solute in water in  $\text{m}^2 \text{ s}^{-1}$ , and  $\mathbf{u}$  the velocity vector in  $\text{m s}^{-1}$ . The diffusion coefficient of  
 45 glucose in water is  $5.4 \cdot 10^{-10} \text{ m}^2 \text{ s}^{-1}$ .<sup>3</sup> A rectangular pulse function with maximum concentration  
 46 of  $222 \text{ mmol L}^{-1}$  and a fixed frequency between  $0.05 \text{ Hz}$  and  $5 \text{ Hz}$  was imposed as inlet  
 47 concentration.

48 A frequency response analysis was conducted by comparing the normalized substrate  
 49 concentrations measured in the cultivation chamber at a stationary state, with the maximum  
 50 substrate concentration measured in total denoting 100%. A stationary state was assumed  
 51 when the amplitudes measured in the cultivation chamber varied less than 1% over five  
 52 consecutive oscillations. The substrate concentrations in the cultivation chamber were  
 53 determined using the domain probe feature of COMSOL Multiphysics. The results are  
 54 presented in a Bode plot.

55 For the additional study, where the cell colony was implemented, substrate consumption by  
 56 the organisms was modelled using a flux boundary condition at the cell surfaces. The equation  
 57 applied for the dependence of the uptake rate on the surrounding glucose concentration is  
 58 based on Monod assumptions<sup>4</sup>:

59 
$$Q = \hat{Q} \frac{c}{c + K_s}$$

60 A  $K_s$ -value of  $4.5 \text{ mmol L}^{-1}$  for *C. glutamicum* and glucose according to Wendisch *et al.* was  
 61 used.<sup>5</sup> The glucose uptake rate per cell dry weight  $q_G = 4.42 \text{ mmol g}^{-1} \text{ h}^{-1}$  and the single-cell  
 62 dry weight of  $1.5 \cdot 10^{-12} \text{ g}$  reported by Unthan *et al.* for *C. glutamicum* were used to calculate  
 63 an uptake rate  $\hat{Q}$  of  $1.82 \cdot 10^{-7} \text{ mol m}^{-2} \text{ s}^{-1}$ .<sup>6</sup>

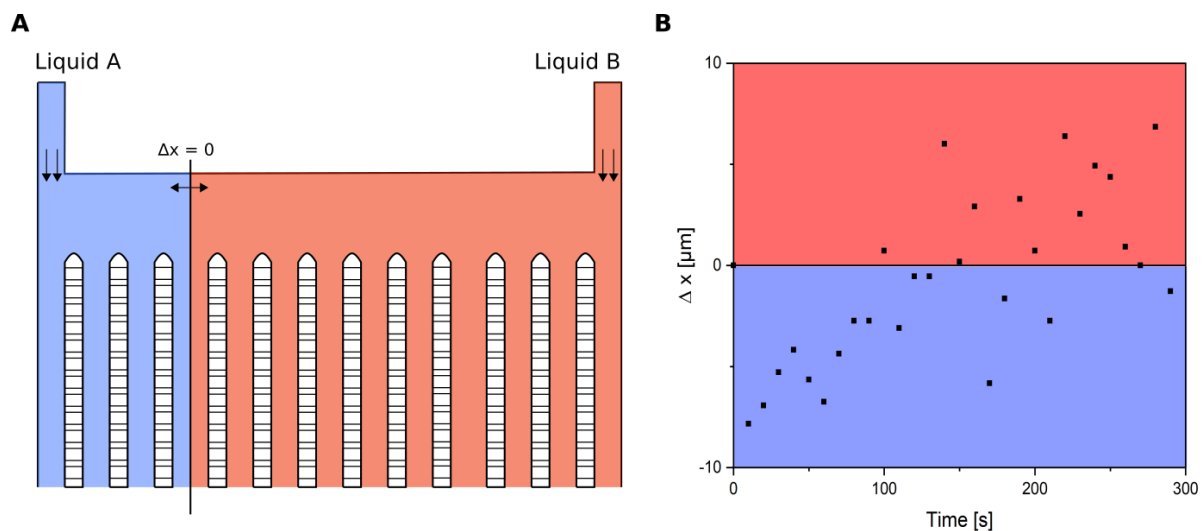

64

65 **Fig. S1:** Displacement of the boundary line between two laminar flows from set point ( $\Delta x = 0$ )  
 66 at the 10 second oscillation.

67

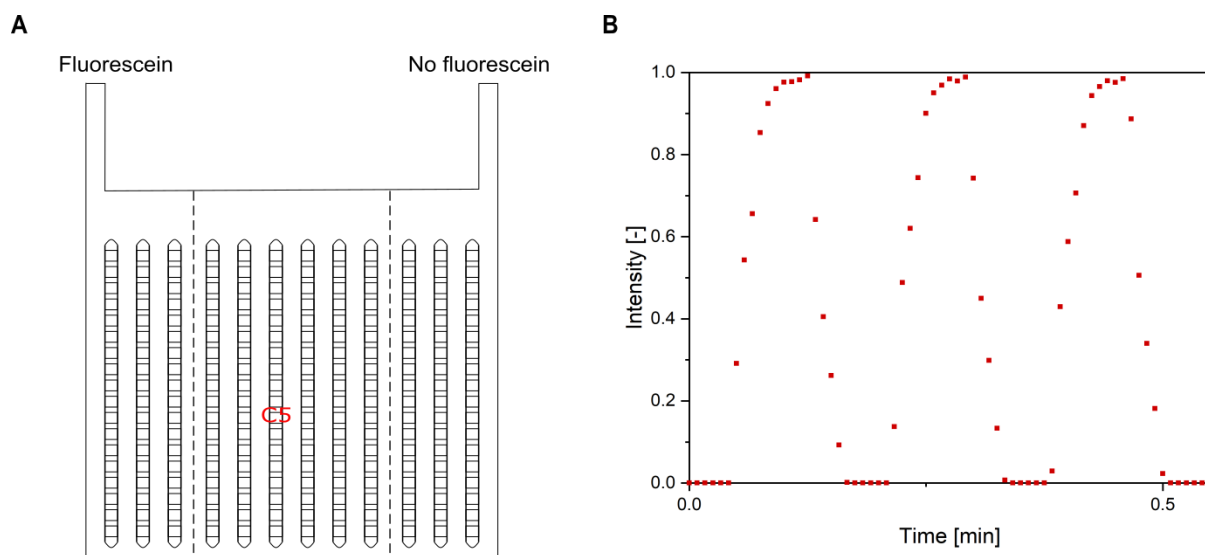

68

69 **Fig. S2:** Result of the experimental validation of the microfluidic device of the 5 second  
 70 oscillation with fluorescein and ethanol at the position C6.

71

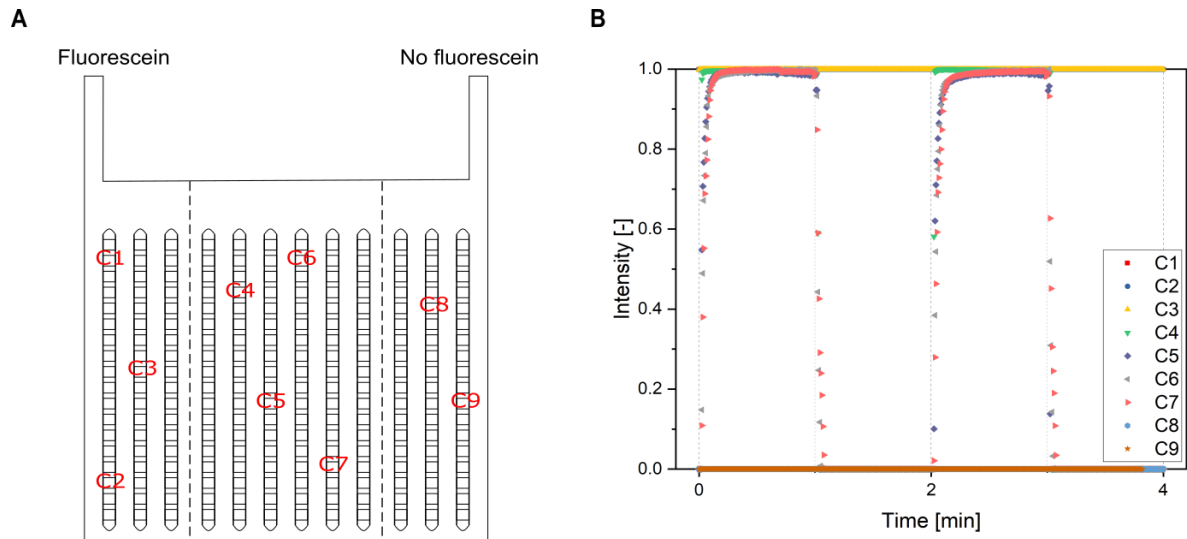

72

73 **Fig. S3:** Experimental validation of the microfluidic device. A) Schematic overview of the  
 74 microfluidic device with selected cultivation chambers for the analysis of the fluorescence  
 75 signal. B) Result of the 1 minute oscillation with fluorescein and ethanol for different positions.

76

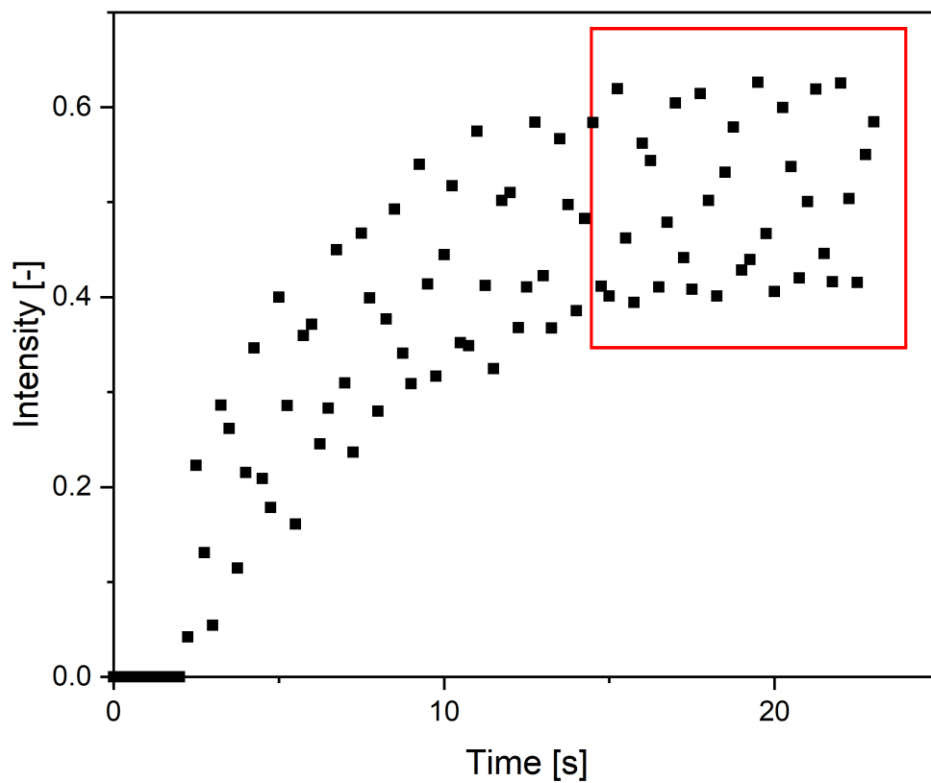

77

78 **Fig. S4:** Transient effect during the 500 ms oscillation. In the red area the average value after  
 79 the transient oscillation was calculated

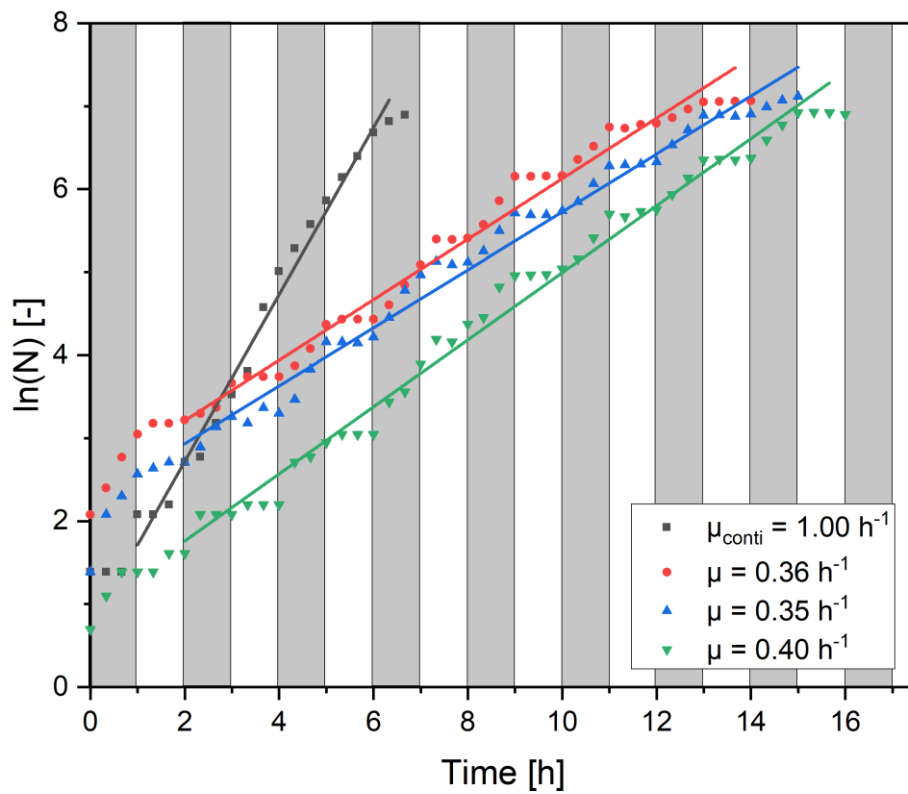

81

82 **Fig. S5:** Growth curves of dMSCC at 60 minute oscillation between BHI medium and PBS  
 83 buffer with linear regression for the determination of the growth rate ( $\mu_{\text{colony}} = (0.37 \pm 0.03) \text{ h}^{-1}$ ).  
 84 The grey areas show the BHI medium pulses and the white areas the PBS buffer pulses.

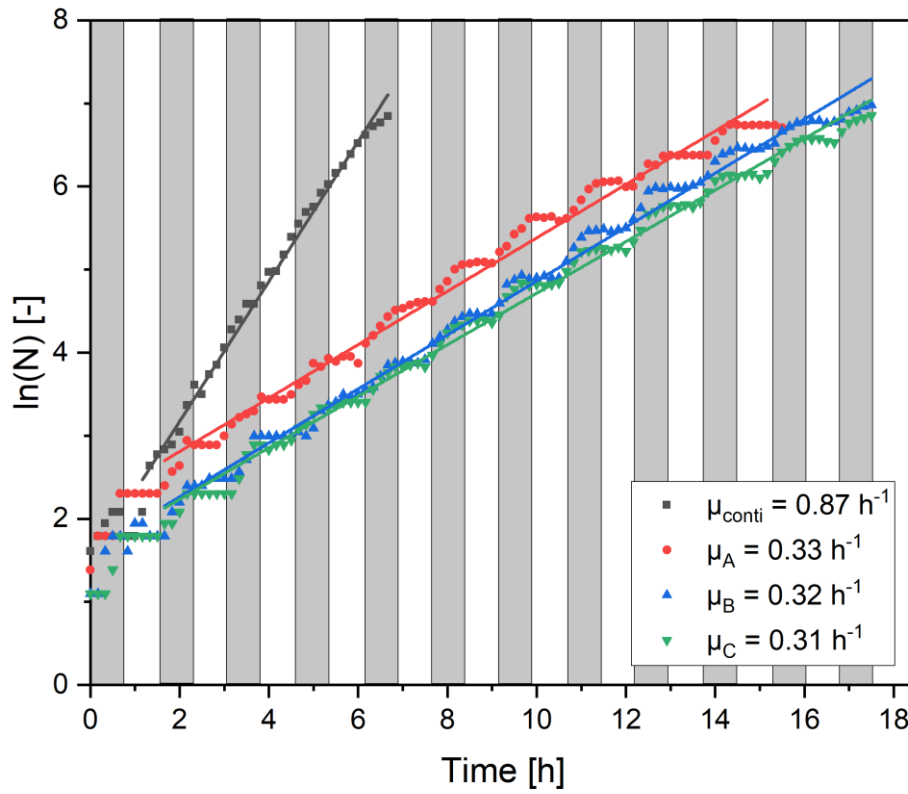

85

86 **Fig. S6:** Growth curves of dMSCC at 45 minute oscillation between BHI medium and PBS  
 87 buffer with linear regression for the determination of the growth rate ( $\mu_{\text{colony}} = (0.32 \pm 0.01) \text{ h}^{-1}$ ).  
 88 The grey areas show the BHI medium pulses and the white areas the PBS buffer pulses.

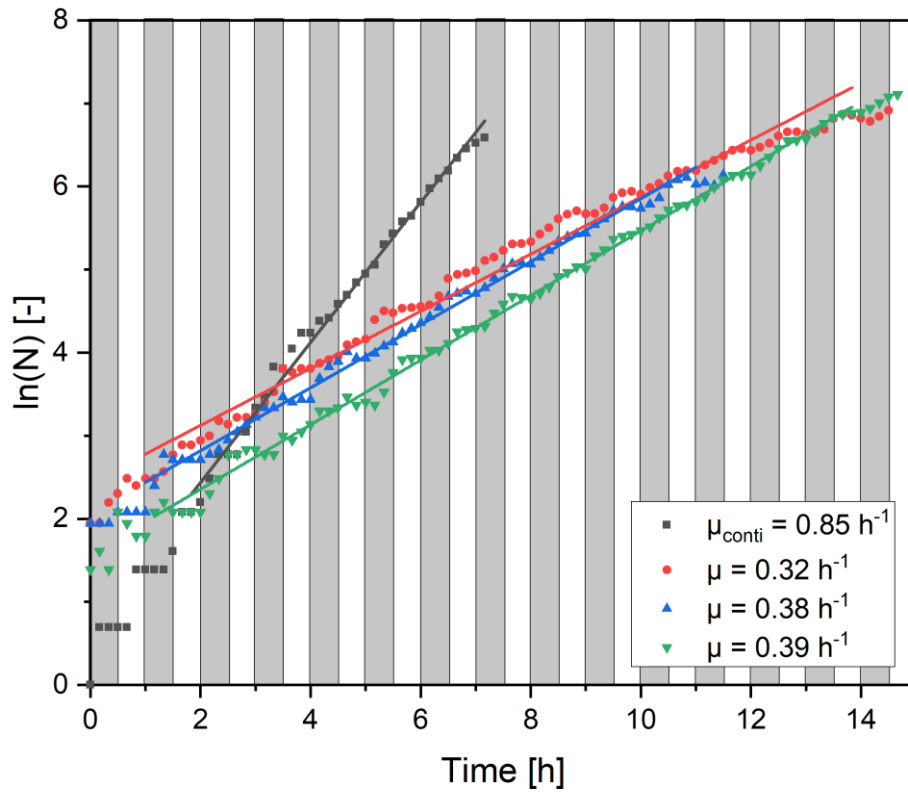

89

90 **Fig. S7:** Growth curves of dMSCC at 30 minute oscillation between BHI medium and PBS  
 91 buffer with linear regression for the determination of the growth rate ( $\mu_{\text{colony}} = (0.36 \pm 0.04) \text{ h}^{-1}$ ).  
 92 The grey areas show the BHI medium pulses and the white areas the PBS buffer pulses.

93

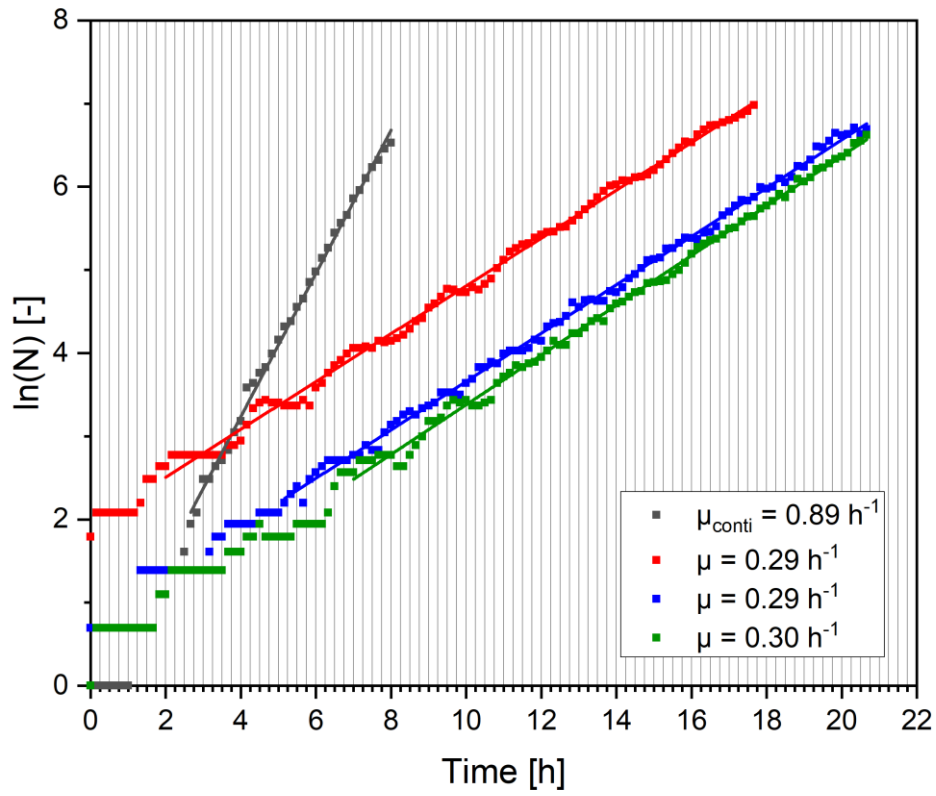

94

95 **Fig. S8:** Growth curves of dMSCC at 15 minute oscillation between BHI medium and PBS  
 96 buffer with linear regression for the determination of the growth rate ( $\mu_{\text{colony}} = (0.29 \pm 0.01) \text{ h}^{-1}$ ).

97



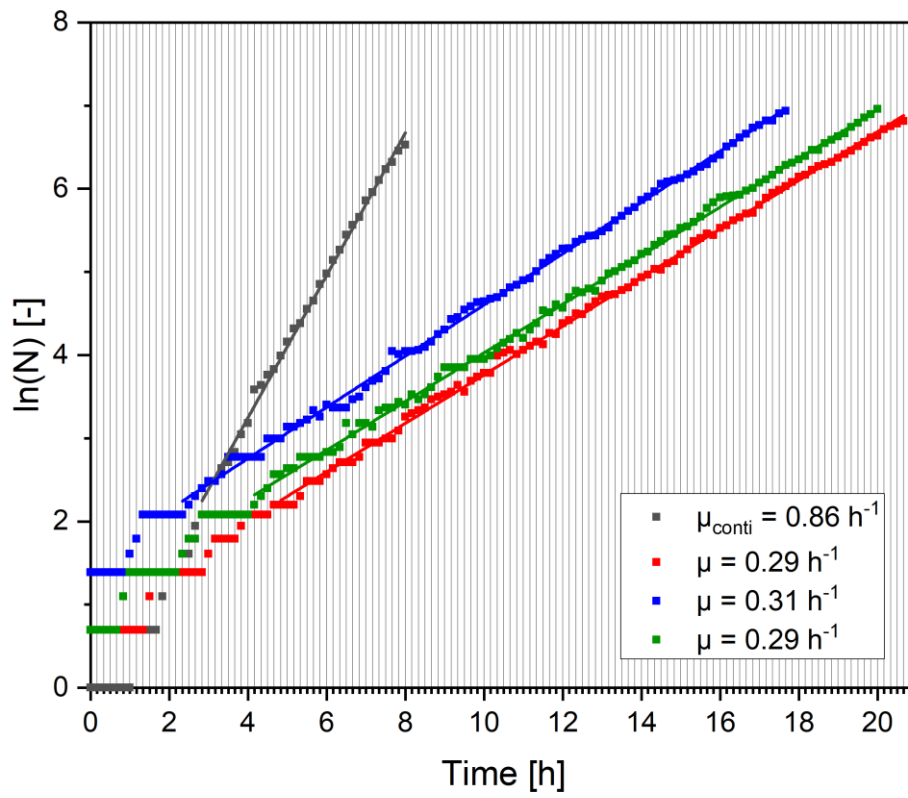

98

99 **Fig. S9:** Growth curves of dMSCC at 10 minute oscillation between BHI medium and PBS  
 100 buffer with linear regression for the determination of the growth rate ( $\mu_{\text{colony}} = (0.30 \pm 0.01) \text{ h}^{-1}$ ).

101

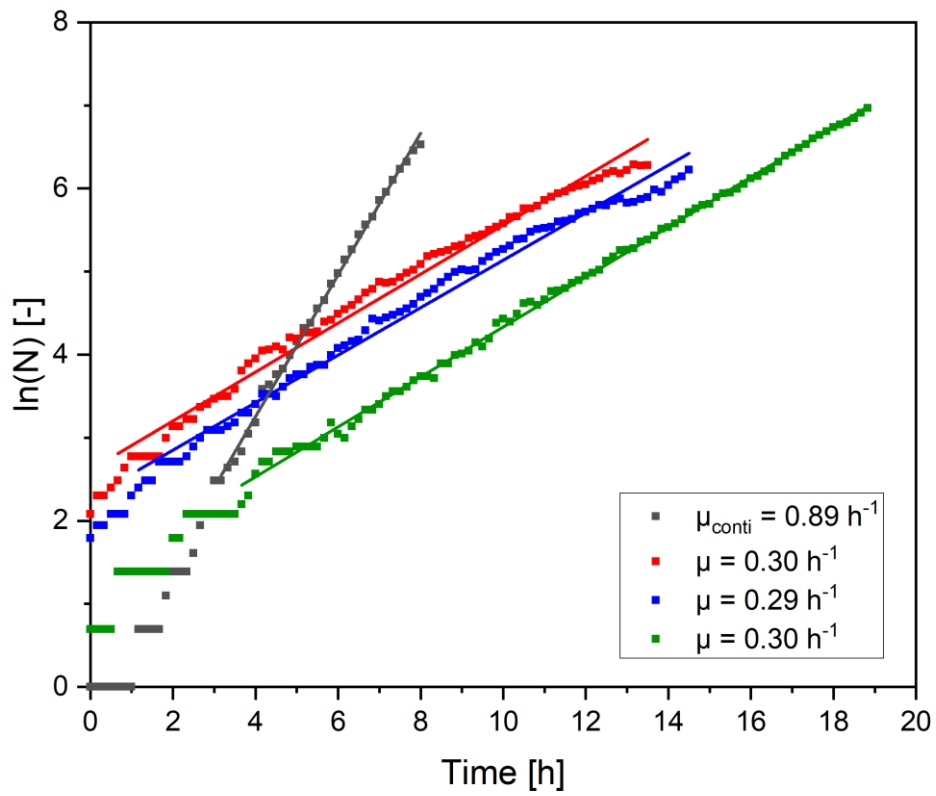

102

103 **Fig. S10:** Growth curves of dMSCC at 5 minute oscillation between BHI medium and PBS  
 104 buffer with linear regression for the determination of the growth rate ( $\mu_{\text{colony}} = (0.30 \pm 0.01) \text{ h}^{-1}$ ).

105

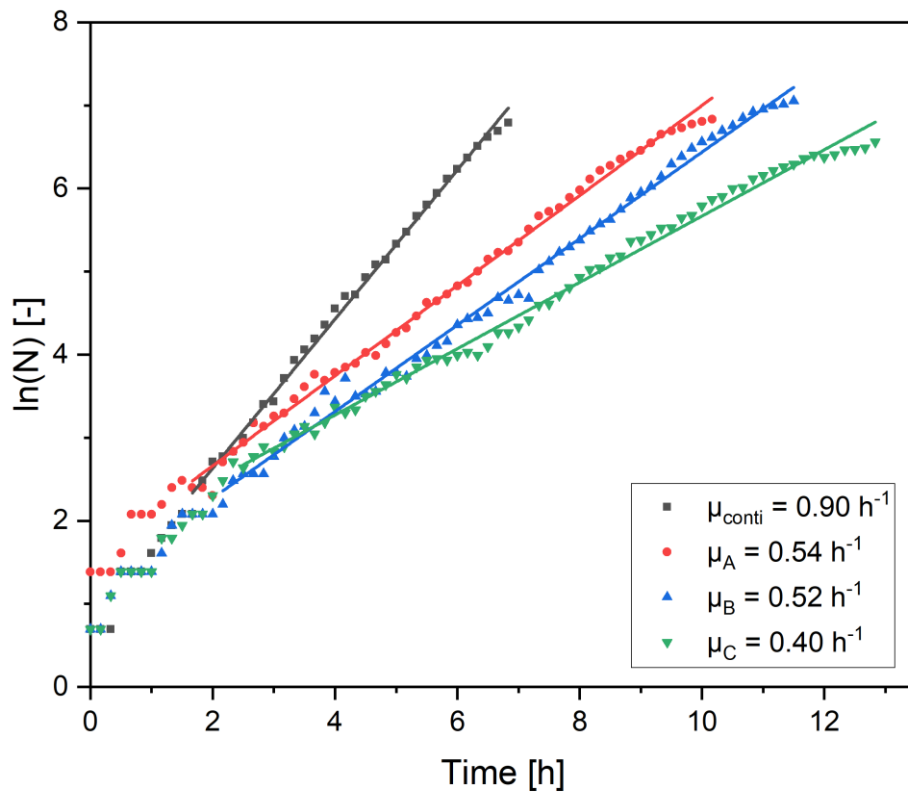

106

107 **Fig. S11:** Growth curves of dMSCC at 1 minute oscillation between BHI medium and PBS  
 108 buffer with linear regression for the determination of the growth rate ( $\mu_{\text{colony}} = (0.49 \pm 0.07) \text{ h}^{-1}$ ).

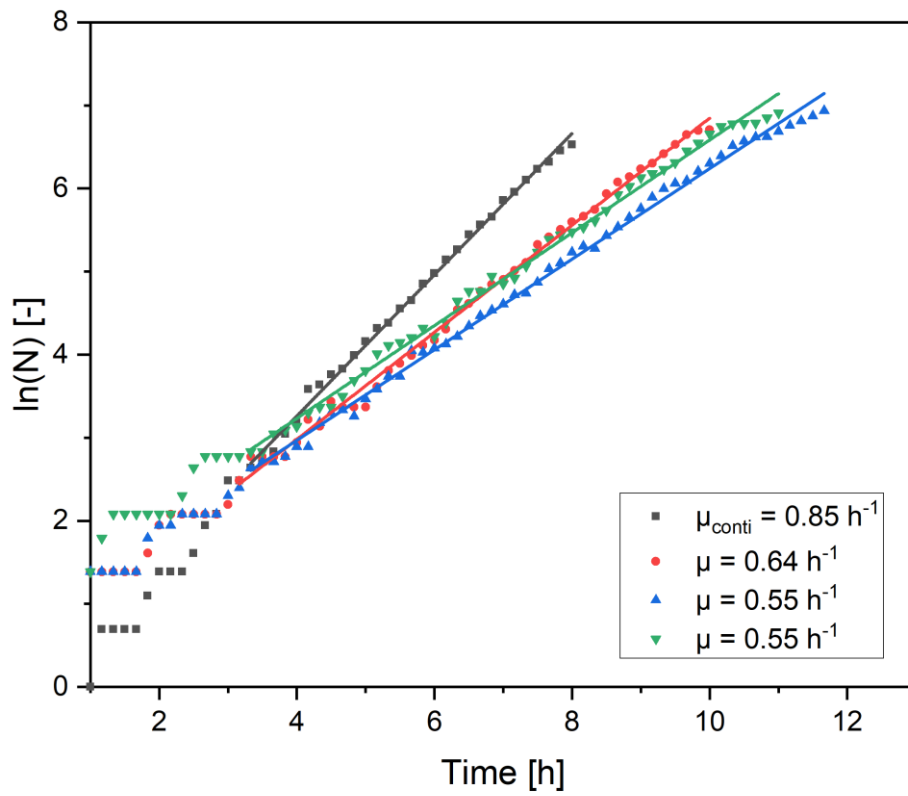

109

110 **Fig. S12:** Growth curves of dMSCC at 20 second oscillation between BHI medium and PBS  
 111 buffer with linear regression for the determination of the growth rate ( $\mu_{\text{colony}} = (0.58 \pm 0.05) \text{ h}^{-1}$ ).

112

113

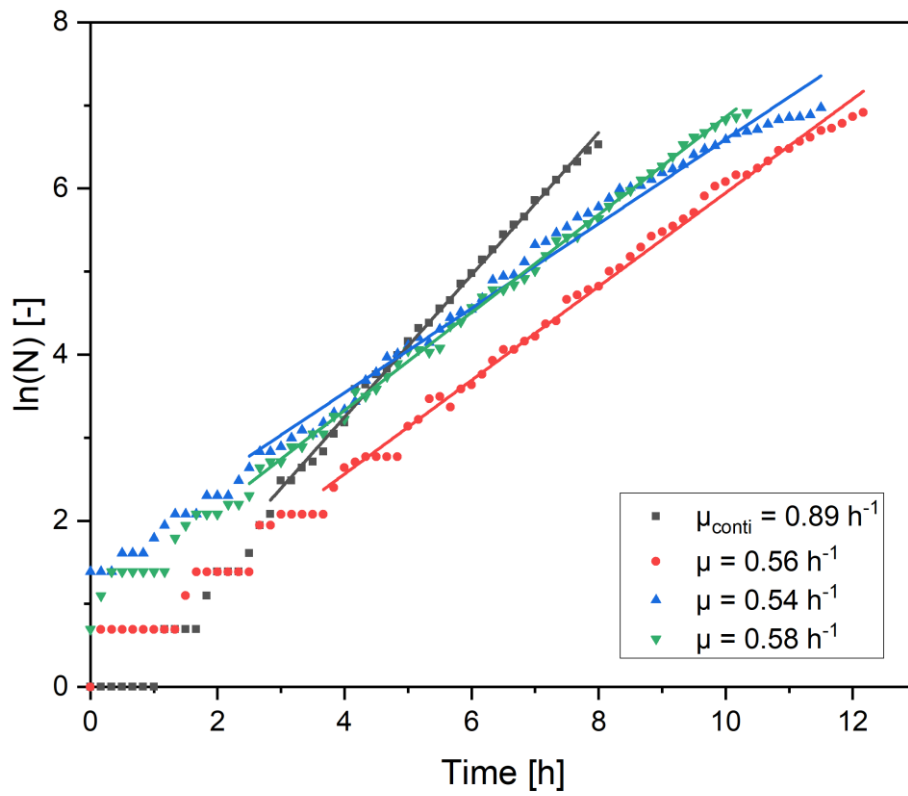

114

115 **Fig. S13:** Growth curves of dMSCC at 10 second oscillation between BHI medium and PBS  
 116 buffer with linear regression for the determination of the growth rate ( $\mu_{\text{colony}} = (0.56 \pm 0.02) \text{ h}^{-1}$ ).

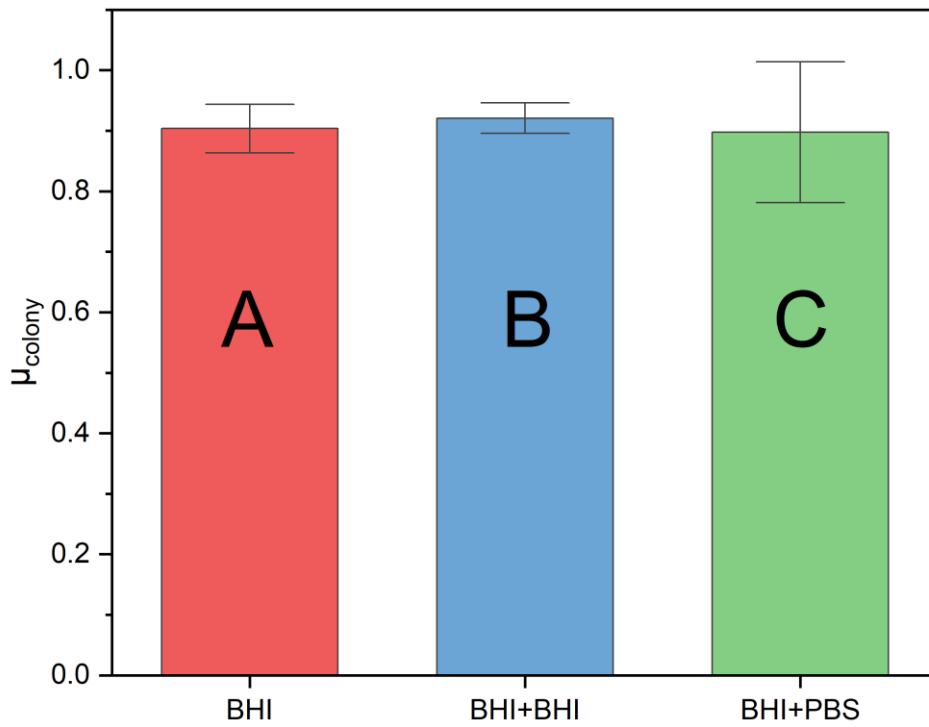

117

118 **Fig. S14:** Overview of different control experiments. A) Continuous cultivation in BHI medium  
119 (red). B) 10 second oscillation between BHI medium and BHI medium (blue). C) Continuous  
120 cultivation with a 1:1 mixture of BHI medium and PBS buffer (green).

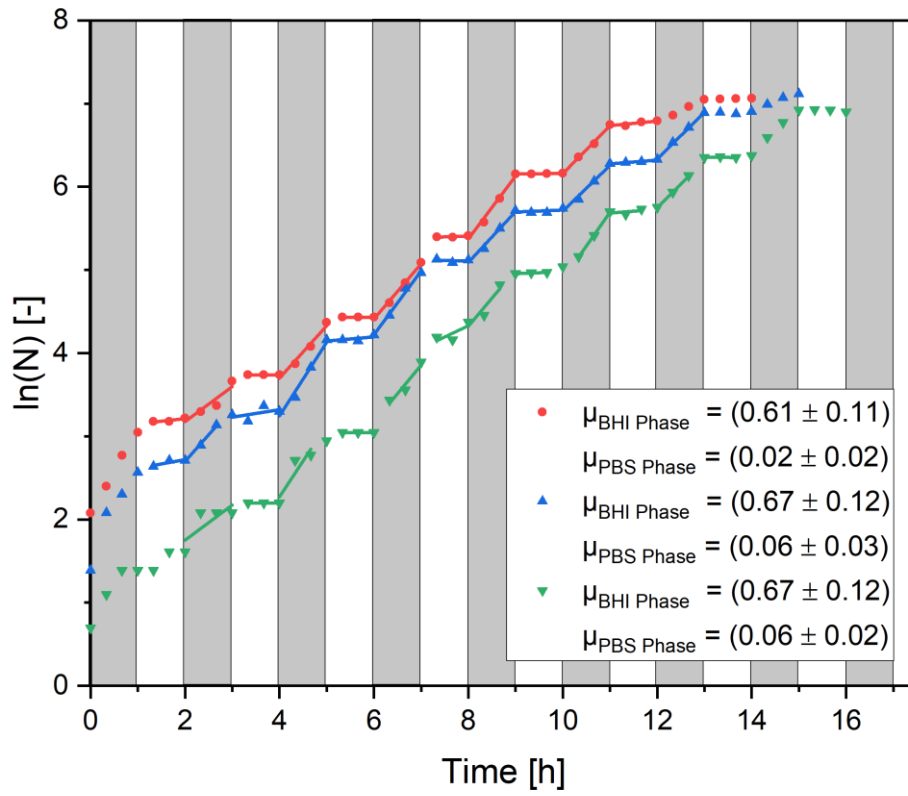

121

122 **Fig. S15:** Growth curves of dMSCC at 1 hour oscillation between BHI medium and PBS buffer  
 123 with linear regression for the determination of the growth rate during the BHI perfusion phase  
 124 and PBS perfusion phase.

125

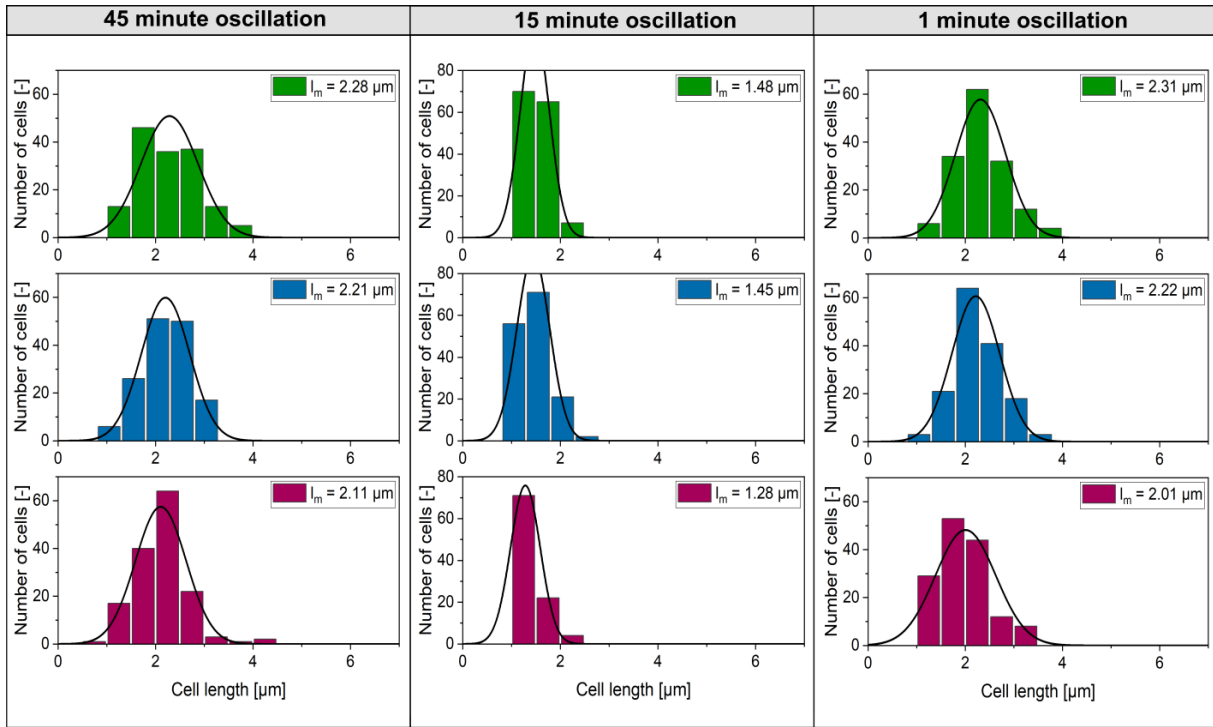

126

127 **Fig. S16:** Cell length histogram of the dMSCC with different oscillations frequencies between  
 128 BHI medium and PBS buffer after 12 h of cultivation, three colony with  $N = 150$  (green, blue,  
 129 red).

130

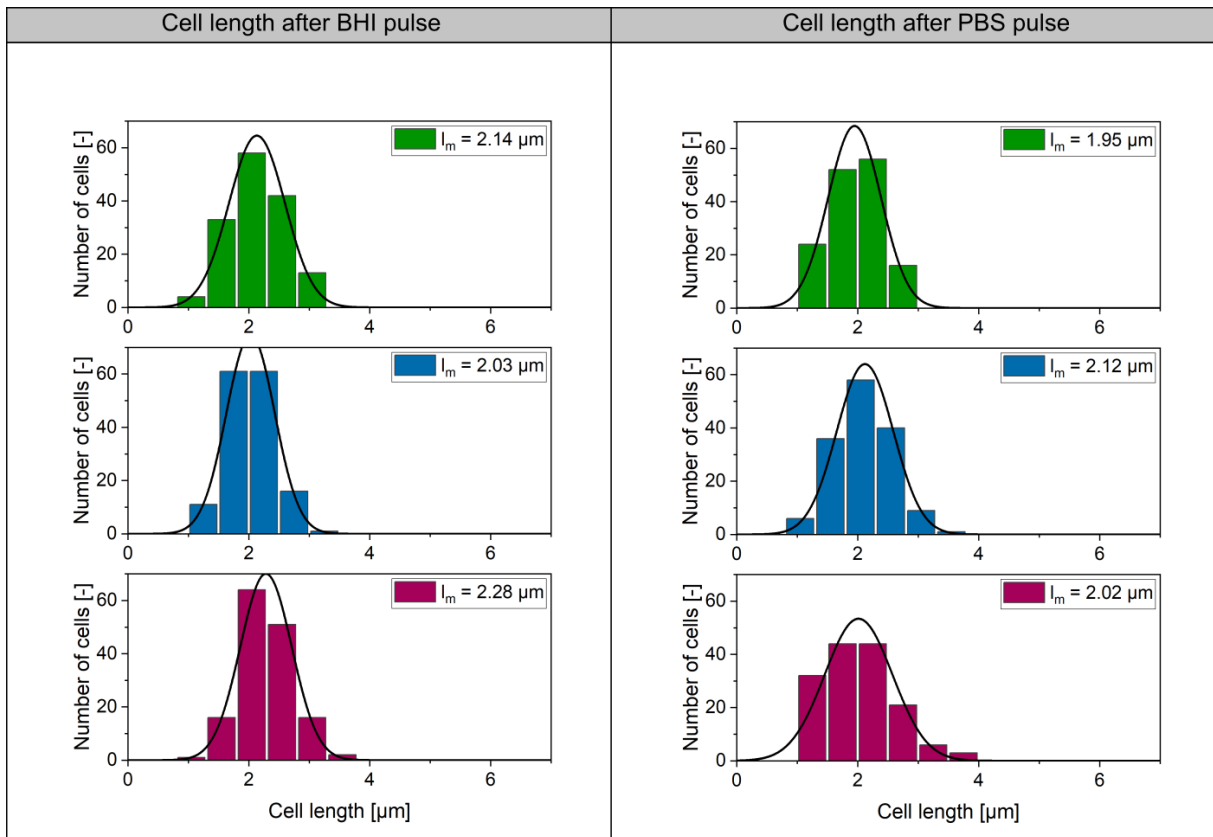

131



132 **Fig. S17:** Cell length histogram of the dMSCC for the 30 minute oscillation after BHI pulse and  
133 after the PBS pulse after 12 h of cultivation, three colony with N = 150 (green, blue, red).

134

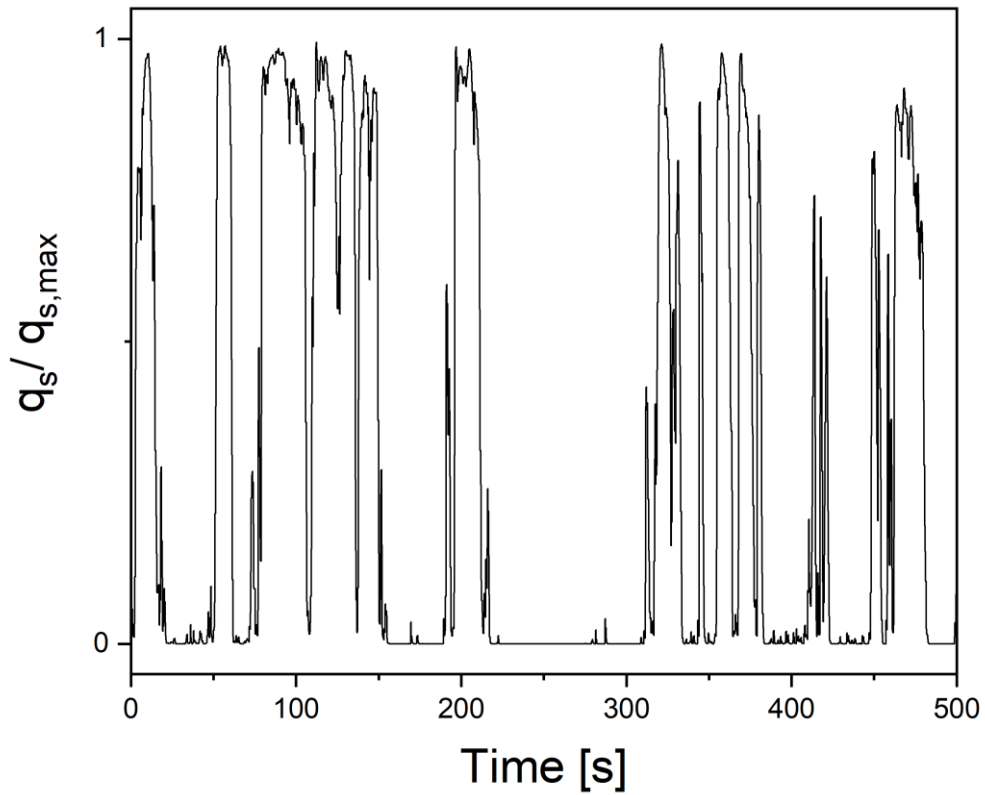

135

136 **Fig. S18:** Typical lifeline of a large-scale bioreactor. Copyright 2020, from Biochemical  
137 Engineering Journal. Adapted with permission from Haringa et al.<sup>7</sup>

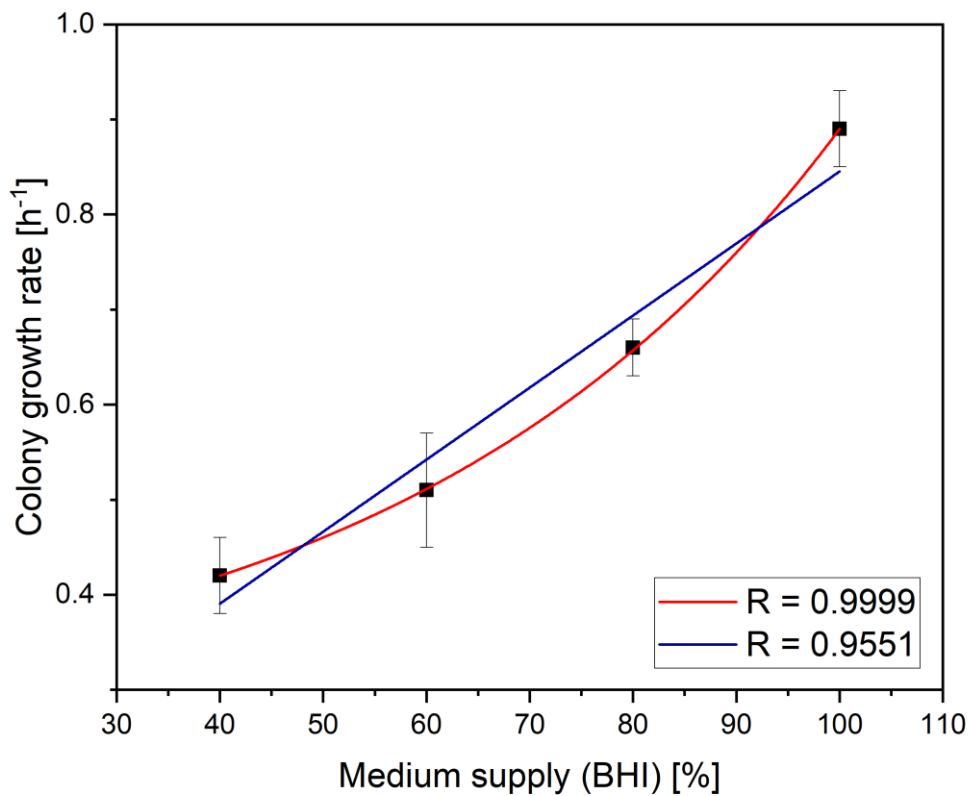

138

139 **Fig. S19:** Correlation analysis between the colony growth rate and the overall medium supply  
 140 by different experimental lifelines.

141

142

143

144 **References**

145 1 C. Probst, A. Grünberger, N. Braun, S. Helfrich, K. Nöh, W. Wiechert and D. Kohlheyer,  
 146 *Anal. Methods*, 2015, **7**, 91–98. DOI: 10.1039/C4AY02257B.

147 2 W.M. Deen, *Analysis of transport phenomena*, Oxford Univ. Press: New York, 1998.

148 3 C.T. Culbertson, S.C. Jacobson and J.M. Ramsey, *Talanta*, 2002, **56**, 365-373. DOI:  
 149 10.1016/S0039-9140(01)00602-6.

150 4 J. Monod, *Ann Rev Microbiol*, 1949, **3**, 371–394. DOI:  
 151 10.1146/annurev.mi.03.100149.002103.

152 5 V.F. Wendisch, A.A. de Graaf, H. Sahm, B.J. Eikmanns, *J. Bacteriol.*, 2000, **182**, 3088–  
 153 3096. DOI: 10.1128/jb.182.11.3088-3096.2000.

- 154 6 S. Unthan, A. Grünberger, J. van Ooyen, J. Gätgens, J. Heinrich, N. Paczia, W.  
155 Wiechert, D. Kohlheyer, S. Noack, *Biotech bioeng*, 2014, **111**, 359–371. DOI:  
156 10.1002/bit.25103.
- 157 7 C. Haringa, R. F. Mudde and H. J. Noorman, *Biochem Eng J*, 2018, **140**, 57–71. DOI:  
158 10.1016/j.bej.2018.09.001.
