# Supplementary material for: dMSCC: a microfluidic platform for microbial single-cell cultivation of Corynebacterium glutamicum under dynamic environmental medium conditions
Source: Royal Society of Chemistry journal article supplement (doi:10.1039/d0lc00711k), 2020-01-01
Supplement: d0lc00711k2.pdf [file d0lc00711k2.pdf]

## Supplementary Videos

**Title: dMSCC: A microfluidic platform for microbial single-cell cultivation of *Corynebacterium glutamicum* under dynamic environmental medium conditions**

Authors: Sarah Täuber<sup>1</sup>, Corinna Golze<sup>1</sup>, Phuong Ho<sup>2</sup>, Eric von Lieres<sup>2</sup> and Alexander Grünberger<sup>1\*</sup>

<sup>1</sup>Multiscale Bioengineering, Technical Faculty, Bielefeld University, Universitätsstraße 25, 33615 Bielefeld, Germany

<sup>2</sup>Institute of Bio- and Geosciences, IBG-1: Biotechnology, Forschungszentrum Jülich, 52425 Jülich, Germany

\*Corresponding author:

E-Mail: alexander.gruenberger@uni-bielefeld.de

### V1

Growth of *C. glutamicum* in dMSCC at 1 hour oscillation between BHI medium and PBS buffer.

### V2

Growth of *C. glutamicum* in dMSCC at 45 minute oscillation between BHI medium and PBS buffer.

### V3

Growth of *C. glutamicum* in dMSCC at 30 minute oscillation between BHI medium and PBS buffer.

### V4

Growth of *C. glutamicum* in dMSCC at 15 minute oscillation between BHI medium and PBS buffer.

**V5**

Growth of *C. glutamicum* in dMSCC at 10 minute oscillation between BHI medium and PBS buffer.

**V6**

Growth of *C. glutamicum* in dMSCC at 5 minute oscillation between BHI medium and PBS buffer.

**V7**

Growth of *C. glutamicum* in dMSCC at 1 minute oscillation between BHI medium and PBS buffer.

**V8**

Growth of *C. glutamicum* in dMSCC at 20 second oscillation between BHI medium and PBS buffer.

**V9**

Growth of *C. glutamicum* in dMSCC at 10 second oscillation between BHI medium and PBS buffer.
